# Supplementary material for: Ultra-Robust Thermoconductive Films Made from Aramid Nanofiber and Boron Nitride Nanosheet for Thermal Management Application
Source: MDPI journal article supplement (doi:10.3390/polym13132028), 2021-06-22
Supplement: s1 [file s1]

## Supplementary Materials

# **Robust Biomimetic Nacreous Aramid Nanofiber/Boron Nitride Nanosheet Films with Excellent Thermal Management Properties**

Li-Hua Zhao <sup>1</sup>, Yun Liao <sup>1</sup>, Li-Chuan Jia <sup>1</sup>, Zong-Xi Zhang <sup>2</sup>, Zhong Wang <sup>1</sup>, Xiao-Long Huang <sup>1</sup>, Wen-Jun Ning <sup>1</sup>, Jun-Wen Ren <sup>1,\*</sup>

<sup>1</sup> *College of Electrical Engineering, Sichuan University, Chengdu 610065, China*

<sup>2</sup> *State Grid of China, State Grid Sichuan Electric Power Research Institute, Chengdu 610041, China*

\*Correponding author.

E-mail address: myboyryl@scu.edu.cn (Junwen Ren)

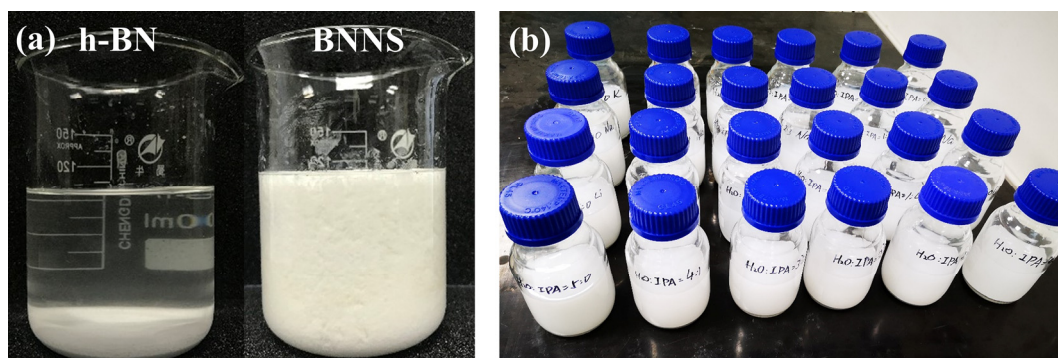

**Figure S1.** (a) Comparison of the stability of h-BN and BNNS. (b) The exfoliated BNNS in different ratios of H<sub>2</sub>O and IPA with different types of alkali metal ions.

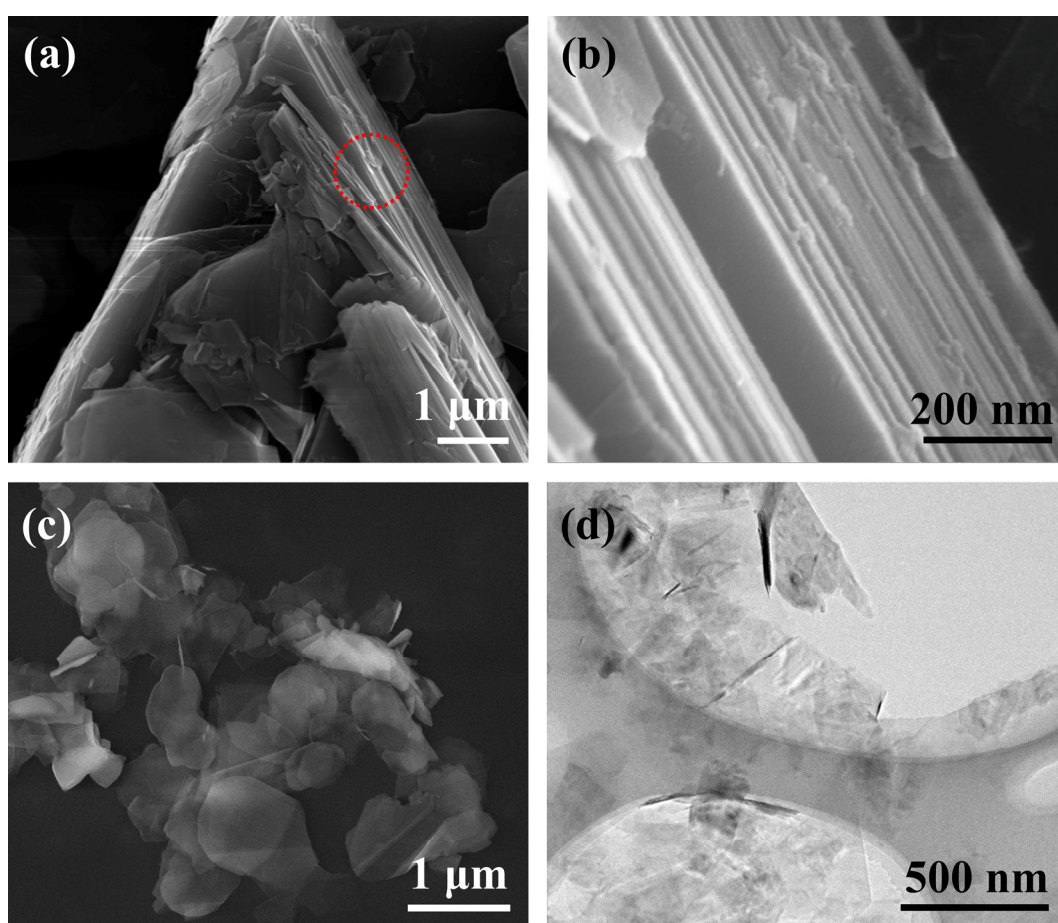

**Figure S2.** (a) SEM images of h-BN and (b) the corresponding side enlargement. (c) SEM image of BNNS. (d) TEM image of BNNS.

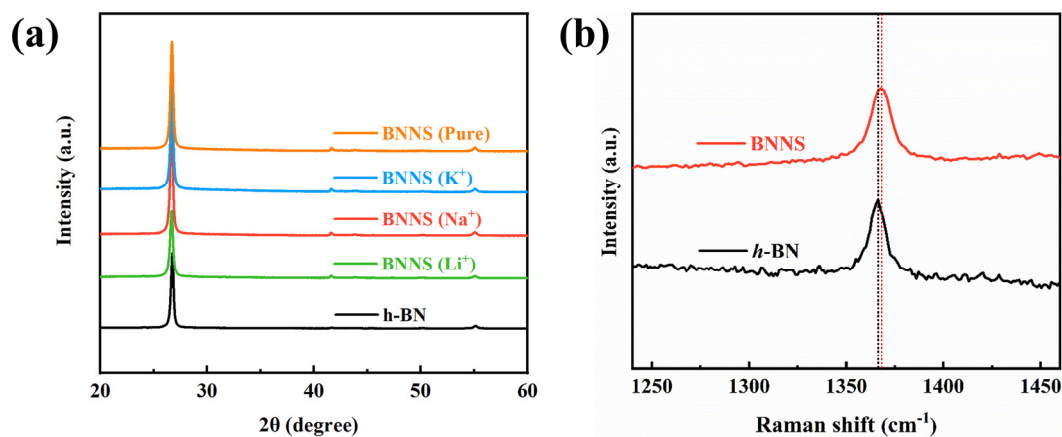

**Figure S3.** (a) The complete XRD patterns of h-BN and BNNS exfoliated by  $Li^+$ ,  $Na^+$ ,  $K^+$ , and no ions. (b) Raman spectra of h-BN and BNNS.

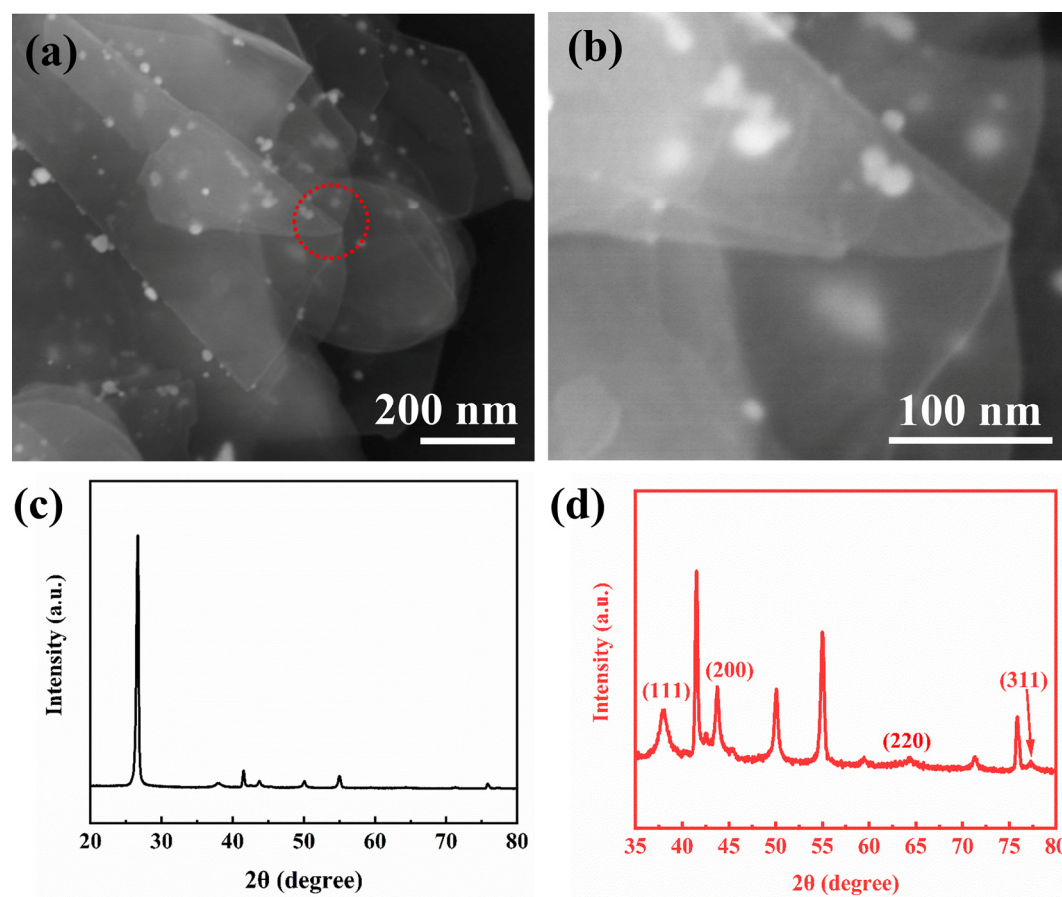

**Figure S4.** TEM images of (a) BNNS@Ag, and (b) the partial magnification of BNNS@Ag. XRD patterns of (c) BNNS@Ag, and (d) the magnification of characteristic peaks.

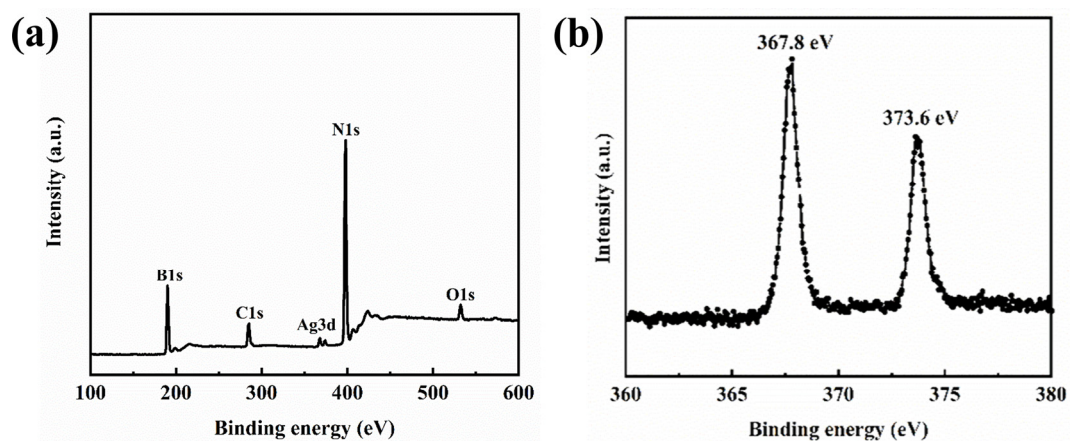

**Figure S5.** XPS spectra of (a) BNNS@Ag, and (b) the corresponding peak magnification of Ag.

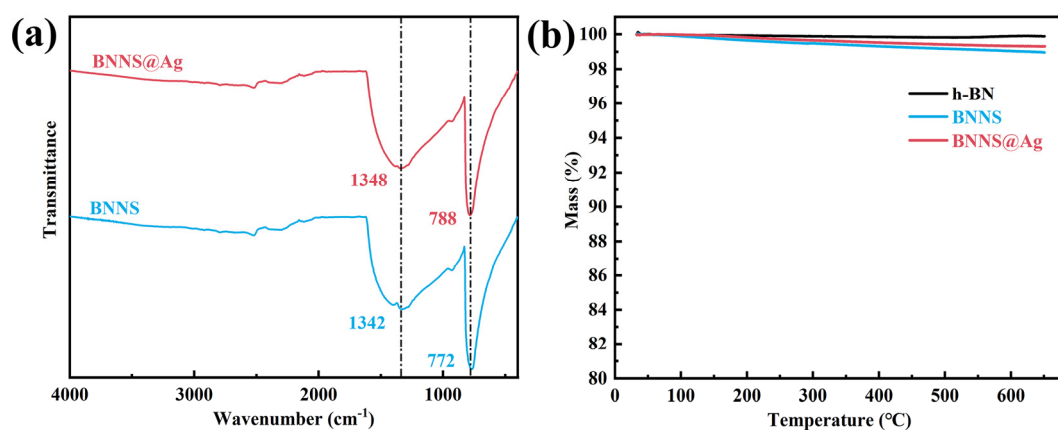

**Figure S6.** (a) FT-IR spectra of the BNNS, and BNNS@Ag. (b) TGA curves of the h-BN, BNNS, and BNNS@Ag.

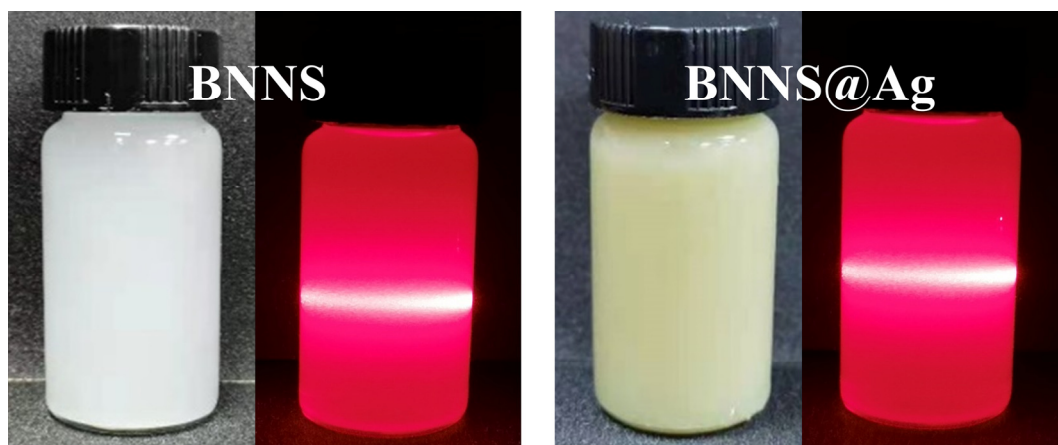

**Figure S7.** Tyndall effect of the BNNS and BNNS@Ag.



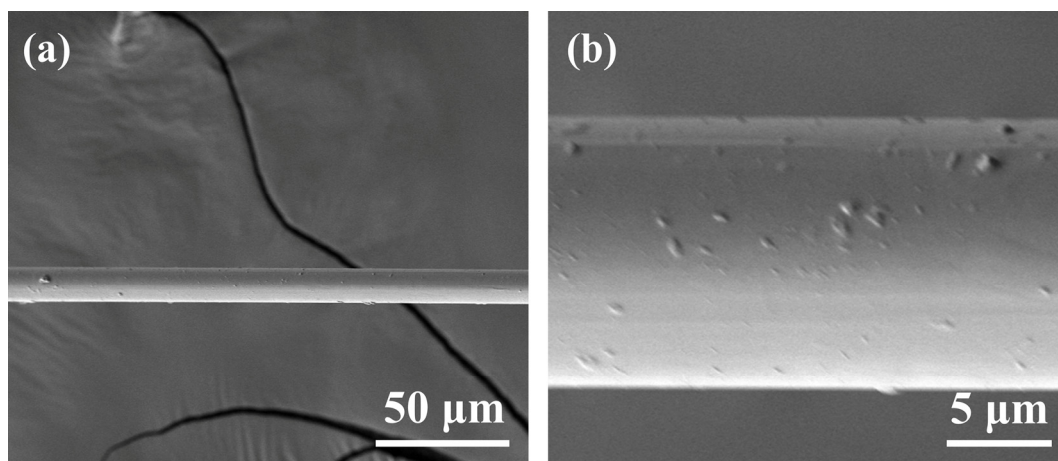

**Figure S8.** SEM image of Kevlar yarn.

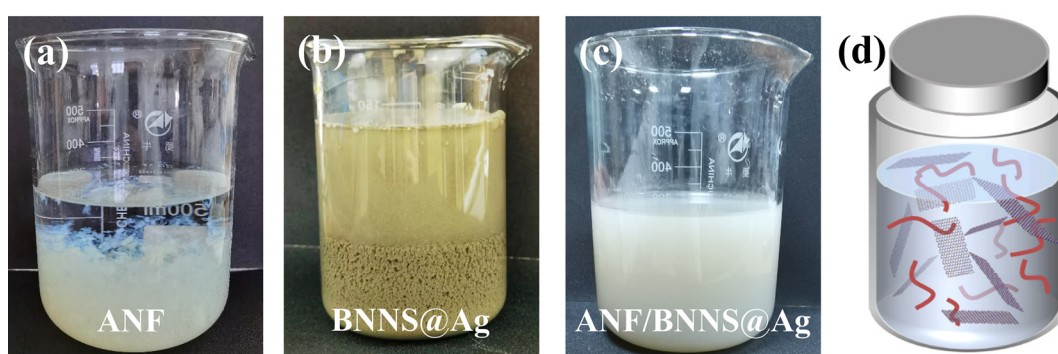

**Figure S9.** Photographs of (a) ANF aqueous solution, (b) BNNS@Ag aqueous solution, and (c) ANF/BNNS@Ag mixed solution of after high shear. (d) Schematic diagram of mixed solution of ANF and BNNS@Ag.

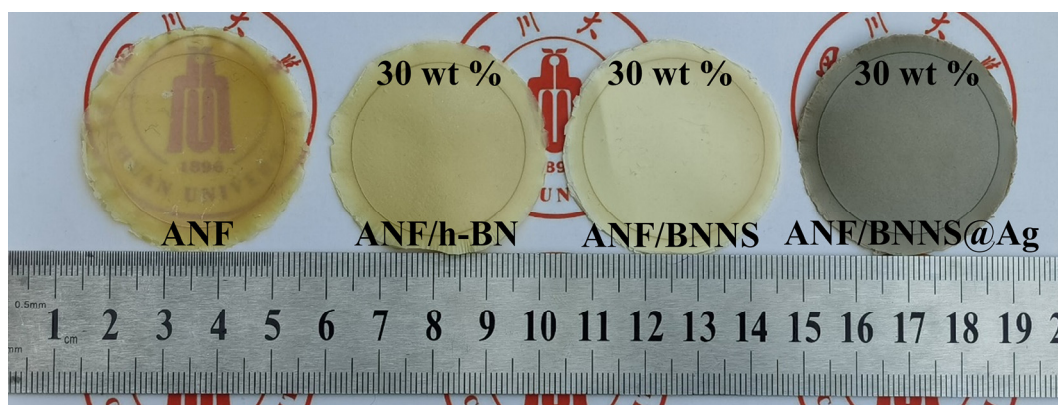

**Figure S10.** Photograph of pure ANF film, 30 wt.% ANF/h-BN, 30 wt.% ANF/BNNS, and 30 wt.% ANF/BNNS@Ag thermally conductive composite films.

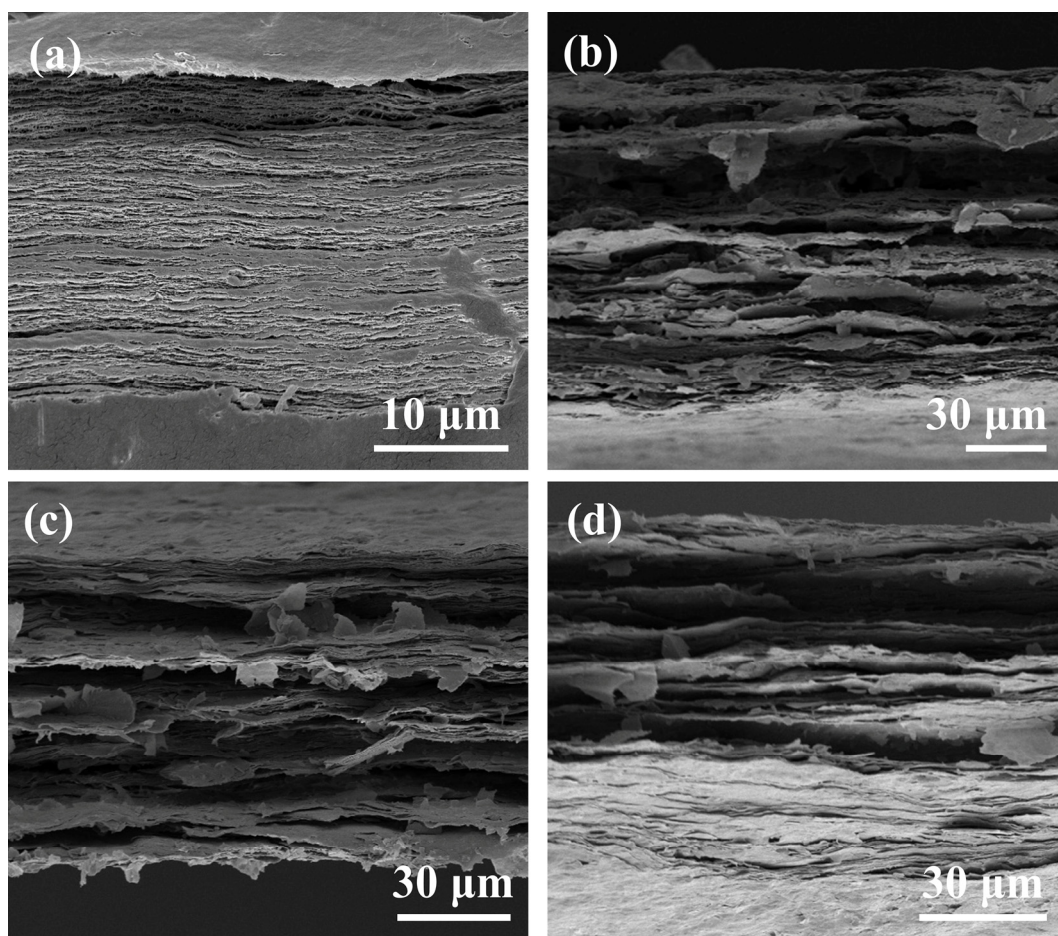

**Figure S11.** Low-magnification SEM images of the fractured surfaces of (a) pure ANF, (b) ANF/h-BN, (c) ANF/BNNS, and (d) ANF/BNNS@Ag thermally conductive composite films.

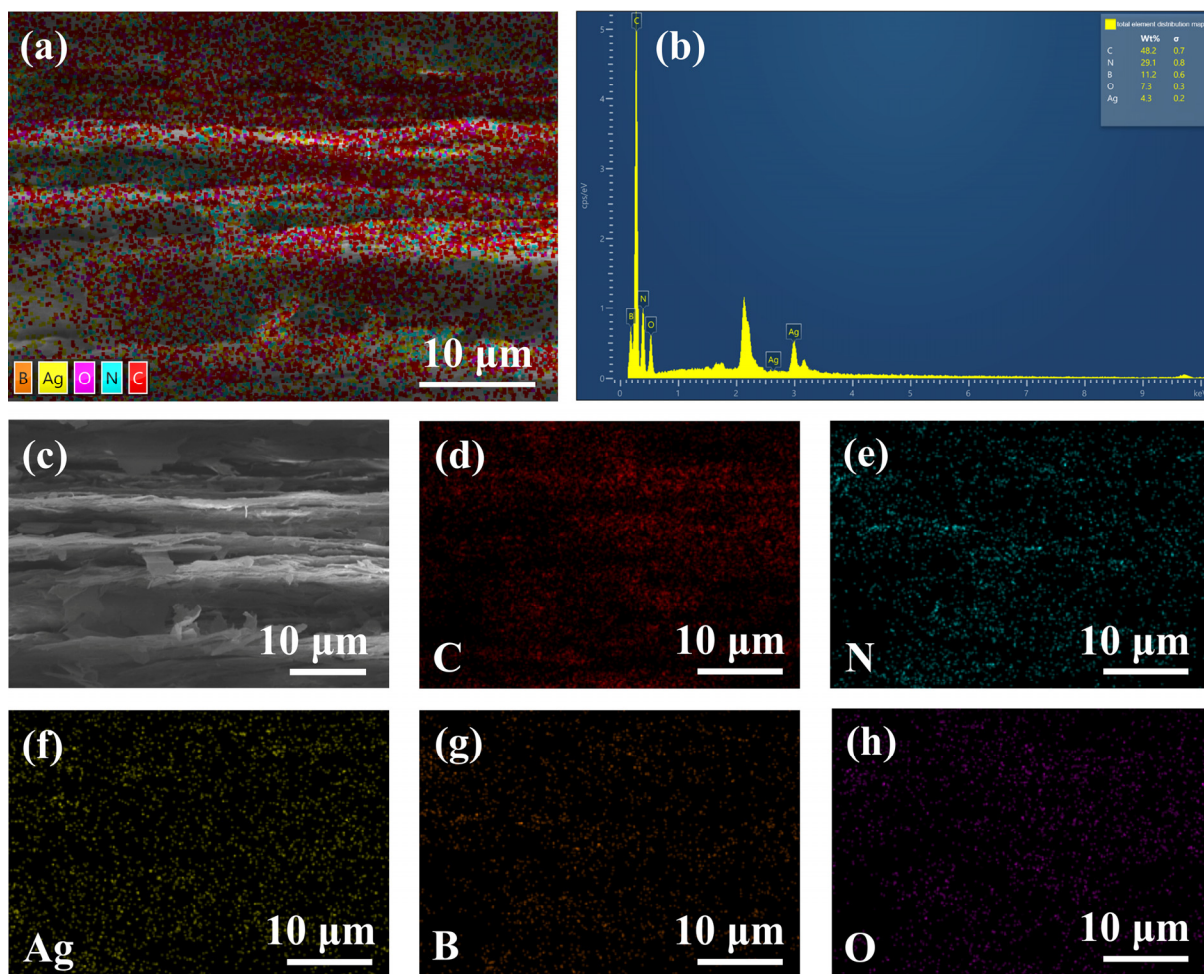

**Figure S12.** (a) EDS elements mapping, and (b) corresponding the EDS spectrum of the ANF/BNNS@Ag film. (c) SEM image of ANF/BNNS@Ag film corresponding to (a), and corresponding EDS elements mapping images of (d) C, (e) N, (f) Ag, (g) B and (h) O.



**Table S1.** The density, the specific heat capacity, the thermal diffusivities, thermal conductivity, the growth rate relative to the pure ANF film, and thermal conductivity enhancement factors of the pure ANF, ANF/BNNS, and ANF/BNNS@Ag composite films.

|                     | Specific<br>heat<br>capacity<br>(J/g·°C) | In-plane<br>thermal<br>diffusivity<br>(mm <sup>2</sup> /s) | Density<br>(g/cm <sup>3</sup> ) | Thermal<br>conductivity<br>(W m <sup>-1</sup> K <sup>-1</sup> ) | Increased<br>percentage<br>(%) | Enhancement<br>factor<br>( $\eta$ ) |
|---------------------|------------------------------------------|------------------------------------------------------------|---------------------------------|-----------------------------------------------------------------|--------------------------------|-------------------------------------|
| Pure ANF            | 1.53                                     | 2.03                                                       | 1.11                            | 3.45                                                            | 0                              | 1                                   |
| ANF/h-BN 10 wt.%    | 1.36                                     | 2.45                                                       | 1.18                            | 3.92                                                            | 13.53                          | 1.31                                |
| ANF/h-BN 20 wt.%    | 1.44                                     | 3.16                                                       | 1.26                            | 5.76                                                            | 66.69                          | 3.31                                |
| ANF/h-BN 30 wt.%    | 1.38                                     | 3.91                                                       | 1.28                            | 6.90                                                            | 99.81                          | 3.30                                |
| ANF/h-BN 40 wt.%    | 1.25                                     | 4.42                                                       | 1.37                            | 7.61                                                            | 120.49                         | 2.99                                |
| ANF/BNNS 10 wt.%    | 1.37                                     | 3.02                                                       | 1.15                            | 4.75                                                            | 37.45                          | 3.70                                |
| ANF/BNNS 20 wt.%    | 1.26                                     | 3.84                                                       | 1.28                            | 6.19                                                            | 79.35                          | 3.94                                |
| ANF/BNNS 30 wt.%    | 1.40                                     | 5.05                                                       | 1.23                            | 8.67                                                            | 150.97                         | 5.00                                |
| ANF/BNNS 40 wt.%    | 1.22                                     | 6.88                                                       | 1.16                            | 9.73                                                            | 181.85                         | 4.52                                |
| ANF/BNNS@Ag 10 wt.% | 1.20                                     | 3.43                                                       | 1.28                            | 5.23                                                            | 51.61                          | 5.11                                |
| ANF/BNNS@Ag 20 wt.% | 1.28                                     | 3.93                                                       | 1.40                            | 7.07                                                            | 104.77                         | 5.20                                |
| ANF/BNNS@Ag 30 wt.% | 1.32                                     | 5.68                                                       | 1.27                            | 9.47                                                            | 174.38                         | 5.78                                |
| ANF/BNNS@Ag 40 wt.% | 1.19                                     | 7.54                                                       | 1.29                            | 11.51                                                           | 233.27                         | 5.80                                |



**Table S2.** Storage modulus of pure ANF and ANF/BNNS@Ag films with various contents

corresponding to **Figure 5c**.

| Content (%)           | 0    | 10   | 20   | 30   | 40 |
|-----------------------|------|------|------|------|----|
| Storage modulus (Mpa) | 1.53 | 2.03 | 1.11 | 3.45 | 0  |
